# Supplementary material
Source: Royal Society of Chemistry journal article supplement (doi:10.1039/d6ta02035f)
Supplement: d6ta02035f1.pdf [file d6ta02035f1.pdf]

## Supporting Information

### **Uniform Nitrogen-rich Interphase Optimizes Interfacial Kinetics for Stable Graphite Anodes**

*Ao Jia, Nan Wang, Guangyu Pan, Guobin Xi, Xiaohu Yang, Jiarui He\* and Yuping Wu*

Confucius Energy Storage Lab, School of Energy and Environment, Southeast University,  
Nanjing 211189, Jiangsu, China

\*Corresponding author

hejarui123@sina.com (Jiarui He)

## **Experimental Section**

### **Preparation of CPAN**

The CPAN was obtained by heating polyacrylonitrile (PAN,  $M_w=150000$ ) at 400 °C for 6 h under an Ar atmosphere with a ramping rate of 5 °C  $\text{min}^{-1}$ .

### **Preparation of Gr@CPAN**

The Gr@CPAN was synthesised by initially dissolving 0.25 g of polyacrylonitrile (PAN) in dimethylformamide (DMF). Subsequently, 10 g of graphite (Gr) was introduced into the solution, followed by vigorous stirring for 5 h. The homogeneous mixture was then immersed in deionized water, inducing the phase inversion method which precipitated the DMF-dissolved PAN, thereby coating the graphite surface. Finally, the obtained composite was subjected to heat treatment at 400 °C for 6 h under a  $\text{N}_2$  atmosphere, employing a heating rate of 5 °C  $\text{min}^{-1}$ , to yield the final Gr@CPAN. Gr@CPAN<sub>0.5</sub> and Gr@CPAN<sub>1</sub> were obtained through an identical process, differing solely in PAN addition (0.5 g and 1 g, respectively).

### **Material Characterization**

Surface architecture of Gr, CPAN, and Gr@CPAN was visualised through field-emission SEM (ZEISS Sigma 300) and aberration-corrected TEM (FEI Talos F200X G2), resolving hierarchical porosity down to sub-5 nm. Powder XRD (Haoyuan DX-2700BH, Cu  $K\alpha$ ) traced phase evolution across 10–90° at 5°  $\text{min}^{-1}$ . Determination of the specific surface area of the samples was carried out employing a fully automated specific surface analyzer (BET, iPore400, PhysiChem Instruments). TGA (Hengjiu HCT-1) quantified CPAN content of Gr@CPAN by mass loss between 25 °C and 800 °C. XPS (Thermo Scientific K-Alpha) was used to identify the components of the solid electrolyte interphase of Gr and Gr@CPAN after cycling.

### **Electrochemical Measurements**

All electrode (Gr, Gr@CPAN, Gr@CPAN<sub>0.5</sub>, Gr@CPAN<sub>1</sub>, and NCM811) slurries were prepared in a Thinky ARE-310 planetary mixer, keeping active material, acetylene black, and PVDF at a mass ratio of 90:5:5. The slurry containing graphite and graphite-based materials were coated onto copper foil current collector, whereas the NCM811 slurry was uniformly

applied onto aluminum foil. All electrodes were pre-dried at 40 °C for 2 h, then vacuum-dried at 50 °C for 12 h. Half-cell discs (diameter: 10 mm, mass loading:  $\sim 1.5 \text{ mg cm}^{-2}$ ) were punched from Gr, Gr@CPAN, Gr@CPAN<sub>0.5</sub>, and Gr@CPAN<sub>1</sub> electrodes, full-cell cathode (NCM811, diameter: 10 mm, mass loading:  $\sim 10 \text{ mg cm}^{-2}$ ) were paired with anodes (Gr and Gr@CPAN, diameter: 12 mm, mass loading:  $\sim 6.7 \text{ mg cm}^{-2}$ ). Coin-type half-cells and full-cells were assembled using CR2032 and CR2025 hardware (purchased from Canrd), respectively. Celgard 2500 was used as the separator and the electrolyte was 1.0 M LiPF<sub>6</sub> in EC: DMC: EMC = 1:1:1 Vol%.

Galvanostatic testing was performed within voltage range of 0.01 to 3 V for half-cells and 0.5 to 4.3 V for NCM811 full-cell. All cells initially underwent one formation cycle at 0.1 C, followed by long-term cycling at 1 C (1 C = 370 for half cells and 1 C = 200 mAh g<sup>-1</sup> for full-cells). The tests was conducted on a NEWARE battery test system (Shenzhen, China) at 27 °C. To assess lithiophilicity, both Gr and Gr@CPAN anodes were first discharged to 0 V. Subsequently, lithium deposition was conducted by applying a constant current density of 0.5 mA cm<sup>-2</sup> for 2 h. Cyclic voltammetry (CV) and Electrochemical Impedance Spectroscopy (EIS) measurements were recorded on an electrochemical workstation (DongHua Analytical DH7006B). For half-cells, CV scans ranged from 0.01–3 V at a sweep rate of 0.05 mV s<sup>-1</sup>. Multi-rate CV tests utilized the same voltage window with sweep rates of 0.05, 0.1, 0.2, and 0.3 mV s<sup>-1</sup>. EIS spectra were acquired over a frequency range from 0.1 Hz–10 kHz with a 10 mV amplitude. In-situ EIS characterization involved sequential discharge and charge processes between 0.01 and 3 V, with impedance collected at 0.1 V intervals using identical frequency parameters. Subsequent distribution of relaxation times (DRT) analysis was performed using the DRT-TOOLS toolbox (<https://sites.google.com/site/drttools/>) with MATLAB R2021.

**Note S1.** The detailed CPAN content calculation process.

The mass fraction of carbonized polyacrylonitrile (CPAN) in the Gr@CPAN composite was determined from thermogravimetric analysis (TGA) data. Let  $a$  and  $b$  represent the mass fractions of CPAN and graphite in the composite, respectively, where  $a + b = 1$ .

Upon heating to 800 °C under nitrogen atmosphere, the measured mass retentions are:

Gr@CPAN composite: 98.65%

Pure CPAN: 73.46%

Pristine graphite: 99.95%

The overall mass loss of Gr@CPAN (1.35%) arises from the combined contributions of CPAN decomposition (26.54% loss) and graphite residual mass loss (0.05% loss). This relationship is expressed as:

$$0.2654a + 0.0005b = 0.0135$$

Substituting  $b = 1 - a$  and solving:

$$0.2654a + 0.0005(1 - a) = 0.0135$$

$$a = (0.0135 - 0.0005) / (0.2654 - 0.0005) = 0.0491 \text{ or } 4.91 \text{ wt\%}$$

Thus, the CPAN content in Gr@CPAN is determined to be 4.91 wt%.

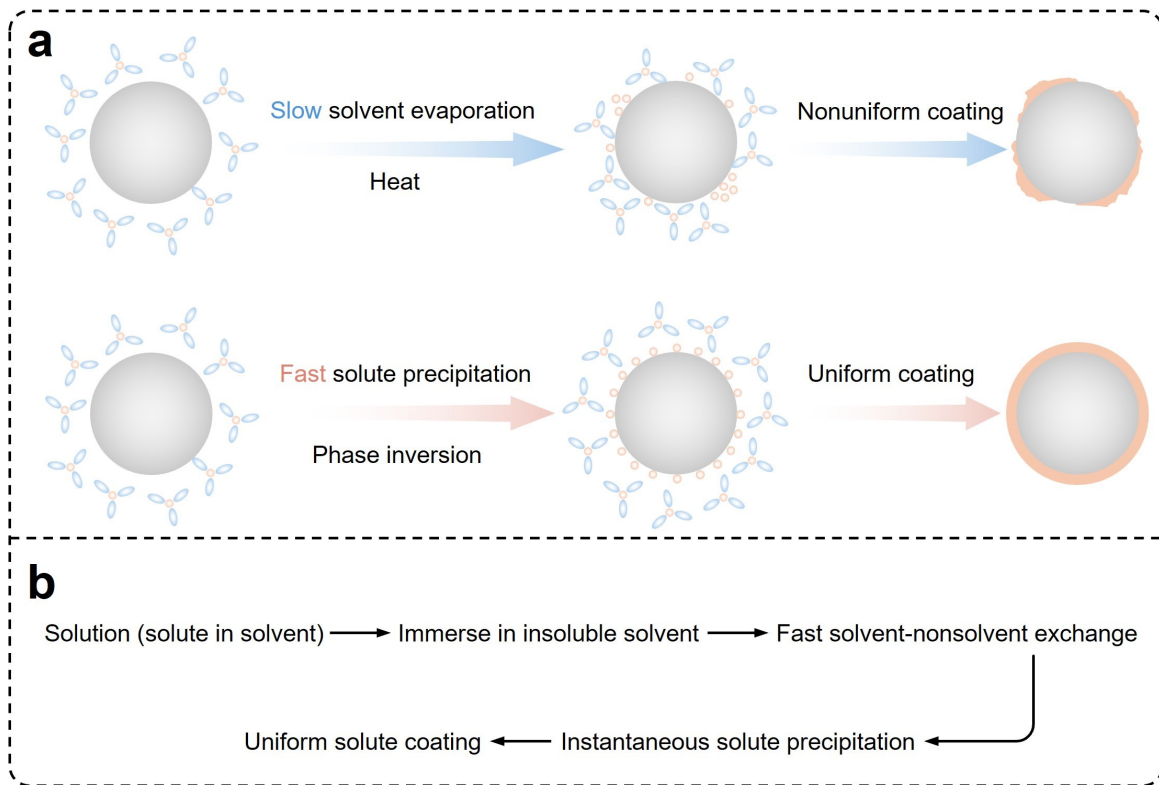

**Fig. S1.** (a) Comparison between conventional wet coating and phase inversion coating. (b) Flow chart of phase inversion coating process.

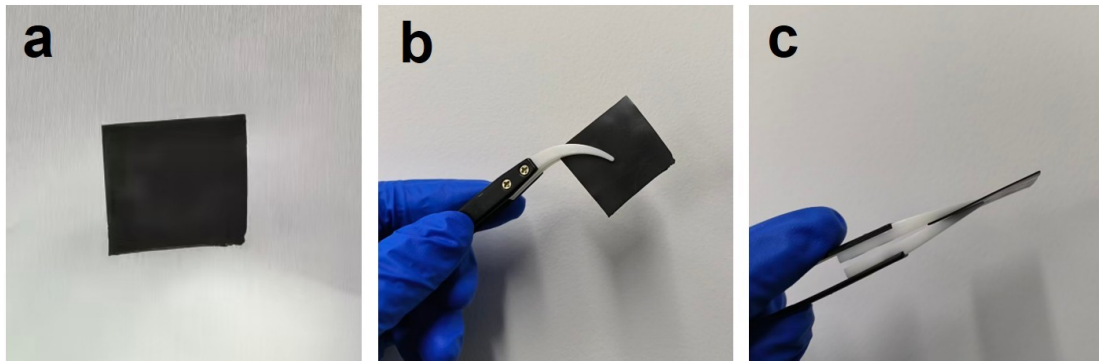

**Fig. S2.** (a-c) Optical photos of precursors obtained after phase inversion method.

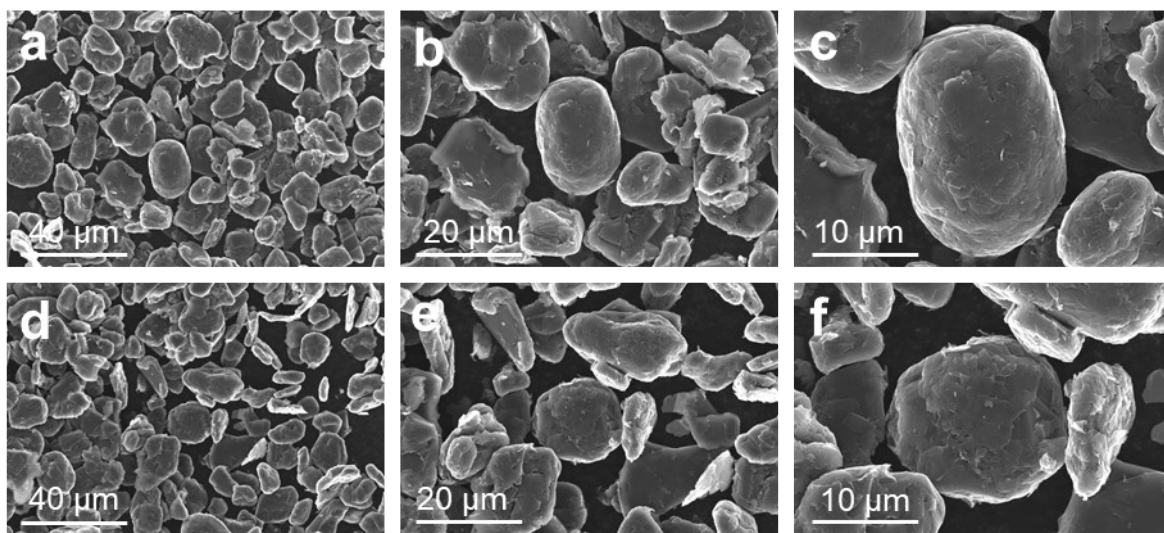

**Fig. S3.** (a-f) SEM images of Gr@CPAN.

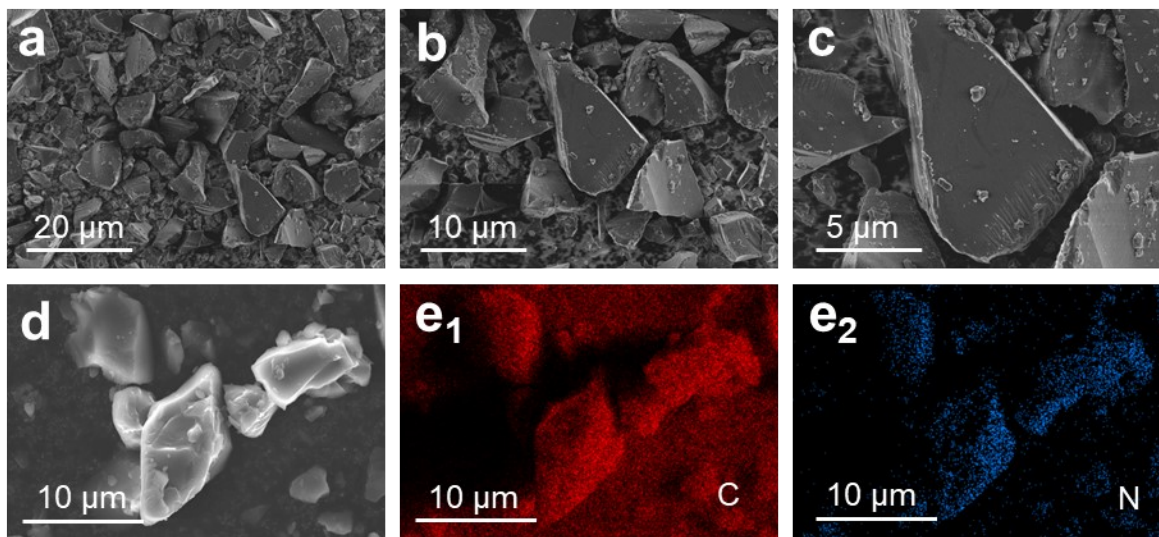

**Fig. S4.** (a-d) SEM images of CPAN. (e<sub>1</sub>, e<sub>2</sub>) Corresponding EDS mappings of C and N.

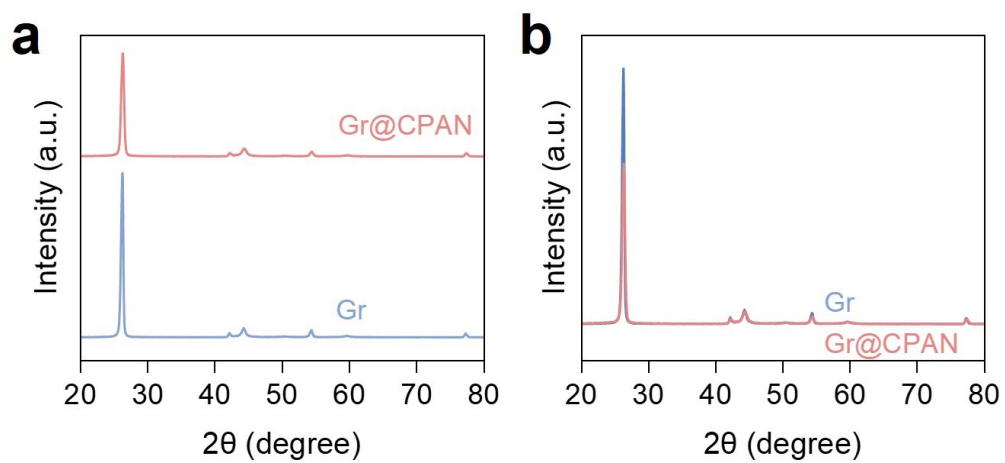

**Fig. S5.** (a) XRD patterns of Gr and Gr@CPAN. (b) XRD stack diagram of Gr and Gr@CPAN.

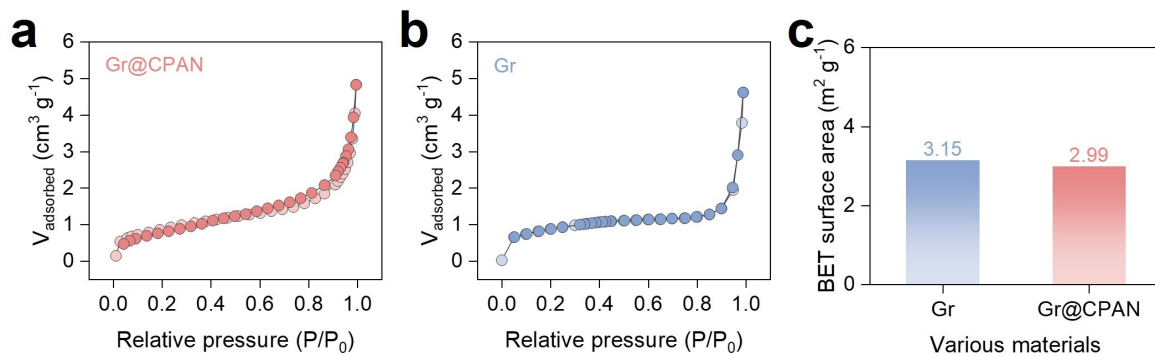

**Fig. S6.** (a) N<sub>2</sub> adsorption-desorption isotherms of Gr@CPAN. (b) N<sub>2</sub> adsorption-desorption isotherms of Gr. (c) Comparative BET surface areas of Gr and Gr@CPAN.

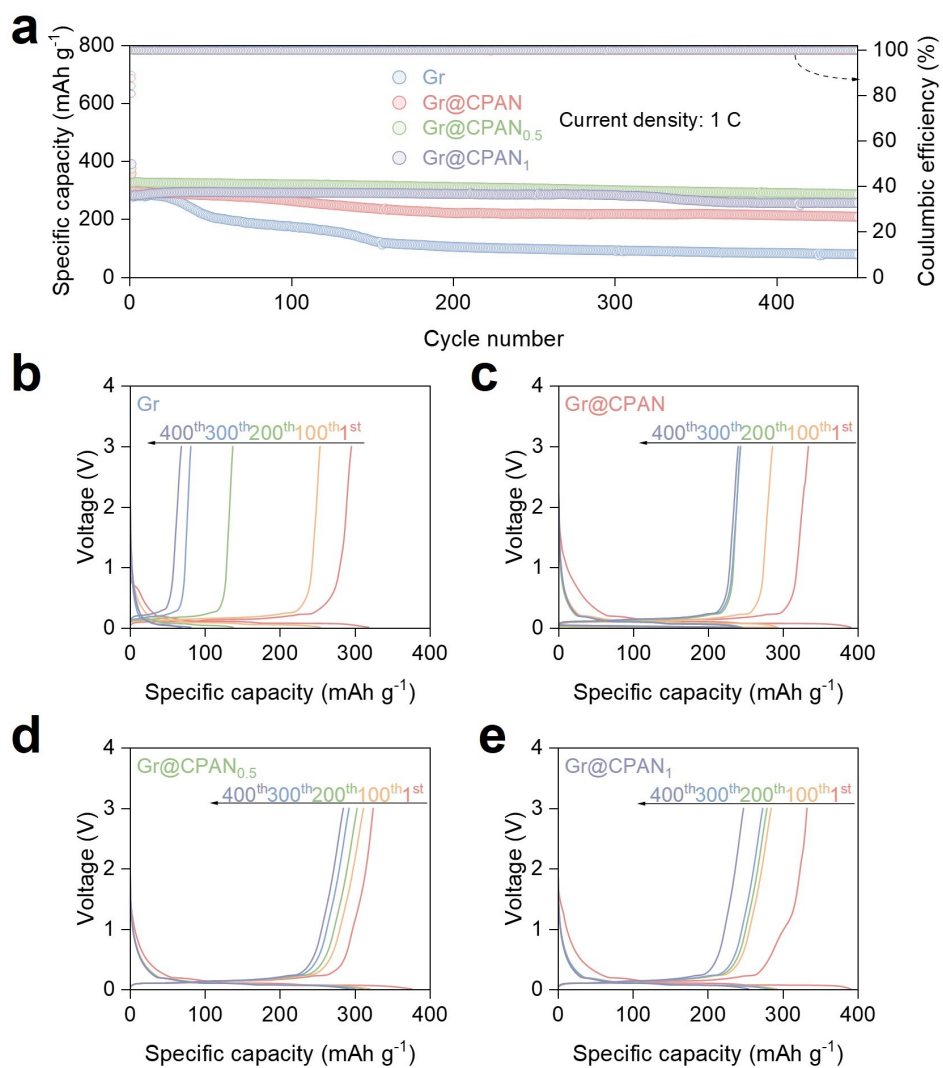

**Fig. S7.** (a) Long-term cycling performances of Gr, Gr@CPAN, Gr@CPAN<sub>0.5</sub>, and Gr@CPAN<sub>1</sub> at a current density of 1 C. (b-e) Corresponding charge/discharge profile of Gr, Gr@CPAN, Gr@CPAN<sub>0.5</sub>, and Gr@CPAN<sub>1</sub>.

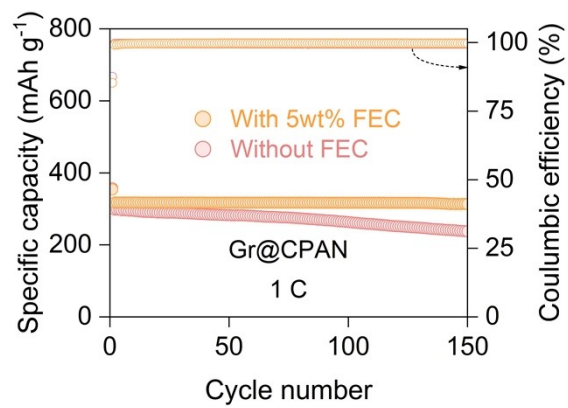

**Fig. S8.** Long-term cycling performances of Gr@CPAN with/without FEC-containing electrolyte at 1 C.

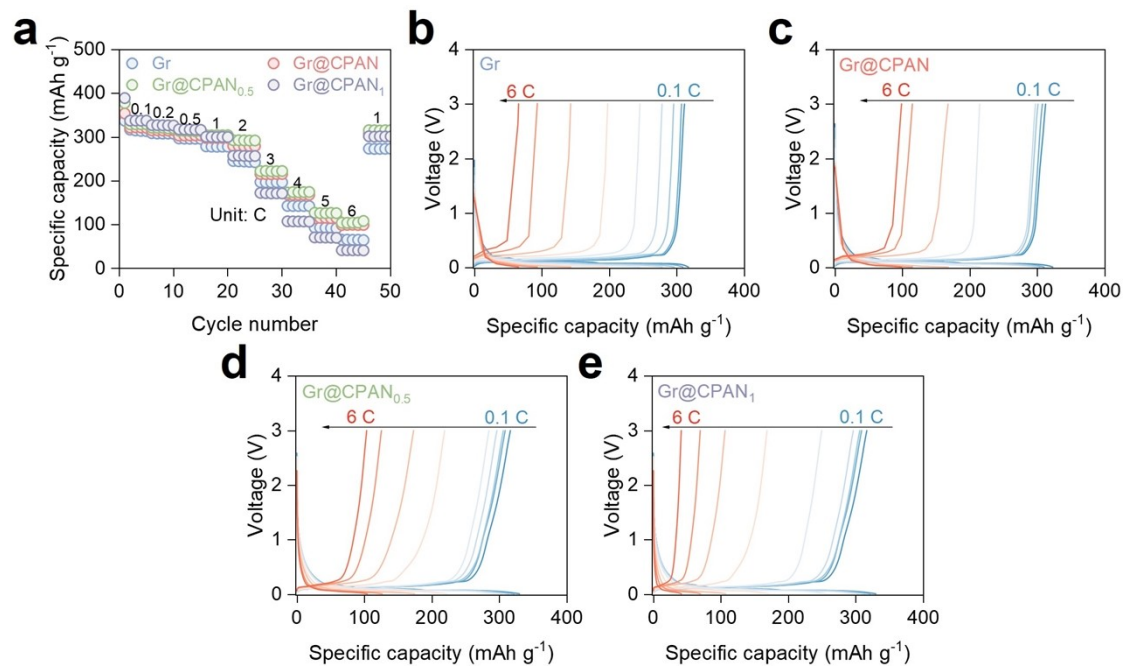

**Fig. S9.** (a) Rate capability of Gr, Gr@CPAN, Gr@CPAN<sub>0.5</sub>, and Gr@CPAN<sub>1</sub> at a current rate of 0.1–6 C. (b-e) Corresponding charge/discharge profile of Gr, Gr@CPAN, Gr@CPAN<sub>0.5</sub>, and Gr@CPAN<sub>1</sub>.

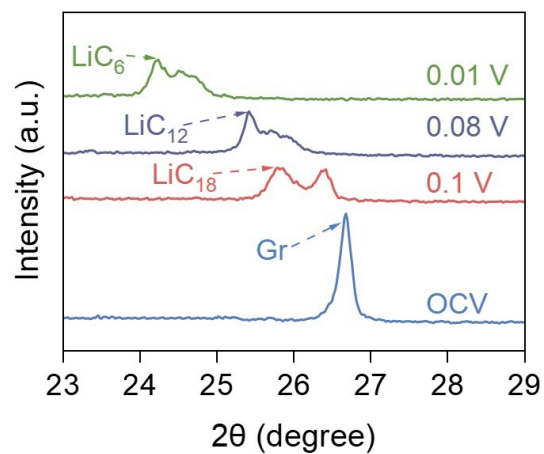

**Fig. S10.** XRD patterns of Gr@CPAN electrodes at different discharge states (fresh, 0.1 V, 0.08 V, and 0.01 V).

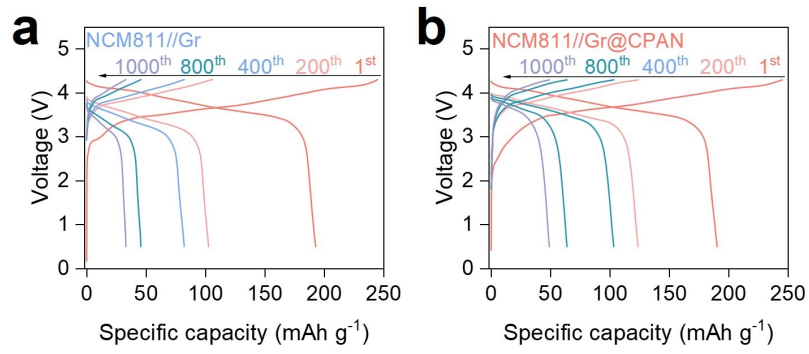

**Fig. S11.** (a-b) Charge/discharge profile of NCM811//Gr and NCM811//Gr@CPAN.

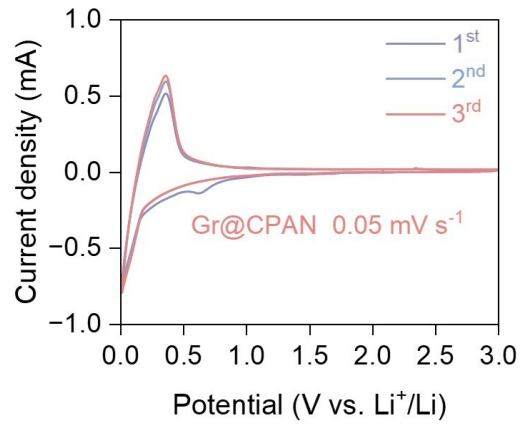

**Fig. S12.** CV curves of Gr@CPAN at 0.05 mV s<sup>-1</sup> during the first three cycles.

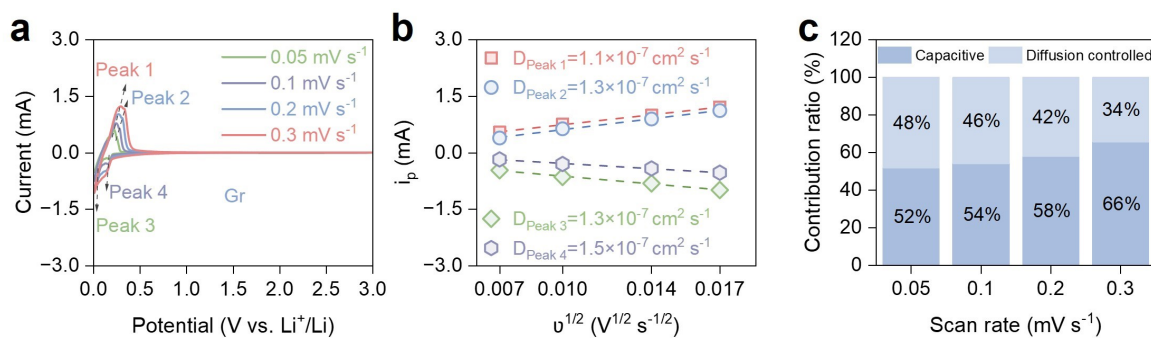

**Fig. S13.** (a) CV curves of Gr under various scan rates. (b) Calculated values of Li<sup>+</sup> diffusion of Gr. (c) Calculated capacity contribution of Gr.

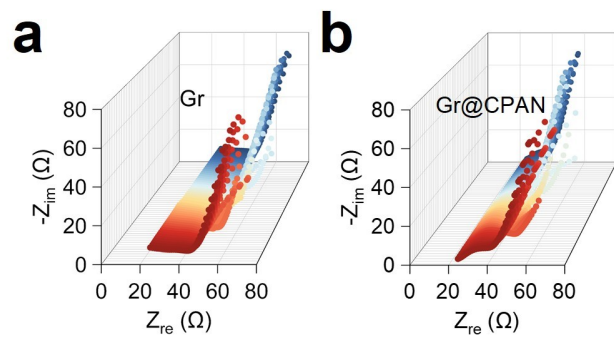

**Fig.S14.** (a) In situ EIS data of Gr after 100 cycles. (b) In situ EIS data of Gr@CPAN after 100 cycles.

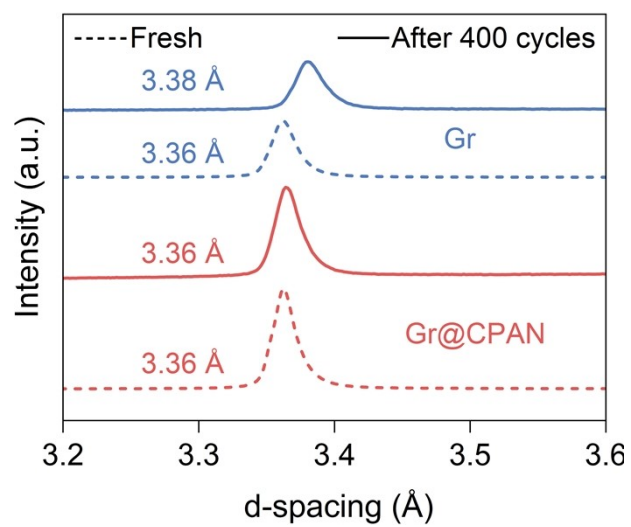

**Fig. S15.** XRD Patterns of fresh Gr anode, fresh Gr@CPAN anode, Gr anode after 400 cycles, and Gr@CPAN anode after 400 cycles with d-spacing axis.

**Table S1.** Elemental content based on EDS results of SEM of Gr@CPAN.

| Element | Mass Fraction (%) | Mass Error (%) |
|---------|-------------------|----------------|
| C       | 99.88             | 1.15           |
| N       | 0.12              | 1.38           |

**Table S2.** Elemental content based on EDS results of STEM of CPAN.

| Element | Mass Fraction (%) | Mass Error (%) |
|---------|-------------------|----------------|
| C       | 93.72             | 1.02           |
| N       | 6.28              | 0.16           |

**Table S3.** Performance comparison of different graphite modifications.

| Materials                                | Electrolyte                                              | Cycling performance (mAh g <sup>-1</sup> ) | Capacity decay per cycle | Refs.            |
|------------------------------------------|----------------------------------------------------------|--------------------------------------------|--------------------------|------------------|
| <b>Gr@S</b>                              | <b>1.0 M LiPF<sub>6</sub> in EC:DMC:EMC (1:1:1 Vol%)</b> | <b>265 after 450 cycles_1 C</b>            | <b>~0.042%</b>           | <b>This work</b> |
| Al <sub>2</sub> O <sub>3</sub> @Graphite | 1.0 M LiPF <sub>6</sub> in EC: EMC (3:7 Vol%)            | ~330 after 100 cycles_1 C                  | ~0.060%                  | [1]              |
| FRA                                      | 1.0 M LiPF <sub>6</sub> in EC:DEC:DMC (1:1:1 Vol%)       | 336 after 100 cycles_0.2 C                 | ~0.090%                  | [2]              |
| CS-Nf                                    | 1.0 M LiPF <sub>6</sub> in EC:DMC:EMC (1:1:1 Vol%)       | ~250 after 350 cycles_0.5 C                | ~0.063%                  | [3]              |
| TiO <sub>2-x</sub> /Graphite             | 1.0 M LiPF <sub>6</sub> in EC/EMC (3:7 Vol%)             | ~250 after 100 cycles_1 C                  | ~0.219%                  | [4]              |

## References

- 1 B. P. Thapaliya, A. S. Ivanov, H. Chao, M. Lamm, M. Chi, H. M. Meyer, X. Sun, T. Aytug, S. Dai and S. M. Mahurin, *Carbon*, 2023, **212**, 118151.
- 2 W. Chen, R. V. Salvatierra, J. T. Li, C. Kittrell, J. L. Beckham, K. M. Wyss, N. La, P. E. Savas, C. Ge, P. A. Advincula, P. Scotland, L. Eddy, B. Deng, Z. Yuan and J. M. Tour, *Adv. Mater.*, 2023, **35**, 2207303.
- 3 H. Wang, N. Qin, Y. Li, Z. Li, F. Zhang, W. Luo, C. Zeng, Z. Lu and H. Cheng, *Carbon*, 2023, **205**, 435-443.
- 4 D. Y. Rhee, J. Kim, J. Moon and M. Park, *J. Alloy. Compd.*, 2020, **843**, 156042.
